# Supplementary material for: Impact of Midwifery-led units in Spain: lessons from the first 5 years
Source: bioRxiv or medRxiv preprint supplement (doi:10.1101/2024.07.16.24310479), 2024-07-16
Supplement: Supplementary file [file media-1.pdf]

| Year               | Births by level of care in Catalonia |                  |                   |                  |                  |                   |                  |                  |                   |                  |                  |                   |                  |                  |                   |                  |                  |                   |
|--------------------|--------------------------------------|------------------|-------------------|------------------|------------------|-------------------|------------------|------------------|-------------------|------------------|------------------|-------------------|------------------|------------------|-------------------|------------------|------------------|-------------------|
|                    | 2018                                 |                  |                   | 2019             |                  |                   | 2020             |                  |                   | 2021             |                  |                   | 2022             |                  |                   | 2023             |                  |                   |
| Level of care      | I                                    | II               | III               | I                | II               | III               | I                | II               | III               | I                | II               | III               | I                | II               | III               | I                | II               | III               |
|                    | N =<br>12121                         | N =<br>13421     | N =<br>17272      | N =<br>11705     | N =<br>13511     | N =<br>17522      | N =<br>10154     | N =<br>12387     | N =<br>17835      | N = 9681         | N =<br>12167     | N =<br>17468      | N =<br>10153     | N =<br>12125     | N =<br>16958      | N = 9610         | N =<br>11753     | N =<br>17269      |
| Caesarian section  | 2348<br>(19.37%)                     | 2672<br>(19.91%) | 4301<br>(24.90%)  | 2410<br>(20.59%) | 2785<br>(20.61%) | 4452<br>(25.41%)  | 2020<br>(19.89%) | 2623<br>(21.18%) | 4589<br>(25.73%)  | 2020<br>(20.87%) | 2673<br>(21.97%) | 4532<br>(25.94%)  | 2230<br>(21.96%) | 2699<br>(22.26%) | 4355<br>(25.68%)  | 2063<br>(21.47%) | 2658<br>(22.62%) | 4707<br>(27.26%)  |
| Spontaneous birth  | 8493<br>(70.07%)                     | 9083<br>(67.68%) | 11107<br>(64.31%) | 8122<br>(69.39%) | 9150<br>(67.72%) | 11104<br>(63.37%) | 7114<br>(70.06%) | 8411<br>(67.90%) | 11391<br>(63.87%) | 6686<br>(69.06%) | 8153<br>(67.01%) | 11310<br>(64.75%) | 6937<br>(68.32%) | 8072<br>(66.57%) | 10994<br>(64.83%) | 6592<br>(68.60%) | 7836<br>(66.67%) | 11060<br>(64.05%) |
| Instrumental birth | 1280<br>(10.56%)                     | 1666<br>(12.41%) | 1864<br>(10.79%)  | 1173<br>(10.02%) | 1576<br>(11.66%) | 1966<br>(11.22%)  | 1020<br>(10.05%) | 1353<br>(10.92%) | 1855<br>(10.40%)  | 975<br>(10.07%)  | 1341<br>(11.02%) | 1626<br>(9.31%)   | 986<br>(9.71%)   | 1354<br>(11.17%) | 1609<br>(9.49%)   | 955<br>(9.94%)   | 1259<br>(10.71%) | 1502<br>(8.70%)   |

|                    | Total births HM |              |              |              |              |              |              |
|--------------------|-----------------|--------------|--------------|--------------|--------------|--------------|--------------|
|                    | Total           | 2018         | 2019         | 2020         | 2021         | 2022         | 2023         |
|                    | N = 3775        | N = 625      | N = 612      | N = 698      | N = 728      | N = 702      | N = 410      |
| Caesarian section  | 666 (17.64%)    | 147 (23.52%) | 100 (16.34%) | 106 (15.19%) | 98 (13.46%)  | 121 (17.24%) | 94 (22.93%)  |
| Spontaneous birth  | 2766 (73.27%)   | 401 (64.16%) | 443 (72.39%) | 536 (76.79%) | 573 (78.71%) | 530 (75.50%) | 283 (69.02%) |
| Instrumental birth | 343 (9.09%)     | 77 (12.32%)  | 69 (11.27%)  | 56 (8.02%)   | 57 (7.83%)   | 51 (7.26%)   | 33 (8.05%)   |

|                    | <b>Total</b> | <b>2017-2018</b> | <b>2019</b> | <b>2020</b>  | <b>2021</b>  | <b>2022</b>  |
|--------------------|--------------|------------------|-------------|--------------|--------------|--------------|
|                    | <i>N=611</i> | <i>N=62</i>      | <i>N=70</i> | <i>N=139</i> | <i>N=198</i> | <i>N=142</i> |
| Type of birth:     |              |                  |             |              |              |              |
| Caesarian section  | 25 (4.09%)   | 5 (8.06%)        | 2 (2.86%)   | 7 (5.04%)    | 4 (2.02%)    | 7 (4.93%)    |
| Spontaneous birth  | 564 (92.3%)  | 51 (82.3%)       | 63 (90.0%)  | 127 (91.4%)  | 190 (96.0%)  | 133 (93.7%)  |
| Instrumental birth | 18 (2.95%)   | 6 (9.68%)        | 3 (4.29%)   | 3 (2.16%)    | 4 (2.02%)    | 2 (1.41%)    |

|                                          | <b>Total</b> | <b>2017-2018</b> | <b>2019</b> | <b>2020</b>  | <b>2021</b>  | <b>2022</b>  |
|------------------------------------------|--------------|------------------|-------------|--------------|--------------|--------------|
|                                          | <i>N=564</i> | <i>N=51</i>      | <i>N=63</i> | <i>N=127</i> | <i>N=190</i> | <i>N=133</i> |
| Type of spontaneous vaginal birth (SVB): |              |                  |             |              |              |              |
| SVB with epidural analgesia              | 59 (10.5%)   | 2 (3.92%)        | 6 (9.52%)   | 17 (13.4%)   | 25 (13.2%)   | 9 (6.77%)    |
| SVB outside of water                     | 325 (57.6%)  | 49 (96.1%)       | 55 (87.3%)  | 105 (82.7%)  | 70 (36.8%)   | 46 (34.6%)   |
| Water birth                              | 180 (31.9%)  | 0 (0.00%)        | 2 (3.17%)   | 5 (3.94%)    | 95 (50.0%)   | 78 (58.6%)   |

|                  | <b>Total</b> | <b>2017-2018</b> | <b>2019</b> | <b>2020</b>  | <b>2021</b>  | <b>2022</b>  |
|------------------|--------------|------------------|-------------|--------------|--------------|--------------|
|                  | <i>N=592</i> | <i>N=59</i>      | <i>N=64</i> | <i>N=135</i> | <i>N=193</i> | <i>N=141</i> |
| <b>Transfer:</b> |              |                  |             |              |              |              |
| No               | 433 (73.1%)  | 43 (72.9%)       | 47 (73.4%)  | 99 (73.3%)   | 142 (73.6%)  | 102 (72.3%)  |
| Yes              | 159 (26.9%)  | 16 (27.1%)       | 17 (26.6%)  | 36 (26.7%)   | 51 (26.4%)   | 39 (27.7%)   |

---

**Total****Nulliparous****Multiparous**

---

*N=587**N=344**N=243*

---

Transfer:

---

No

428 (72.9%)

210 (61.0%)

218 (89.7%)

---

Yes

159 (27.1%)

134 (39.0%)

25 (10.3%)

|                                  | <b>Total</b> | <b>2017-2018</b> | <b>2019</b> | <b>2020</b> | <b>2021</b> | <b>2022</b> |
|----------------------------------|--------------|------------------|-------------|-------------|-------------|-------------|
|                                  | <i>N=129</i> | <i>N=15</i>      | <i>N=15</i> | <i>N=32</i> | <i>N=42</i> | <i>N=25</i> |
| Reason for intrapartum transfer: |              |                  |             |             |             |             |
| Wish for epidural analgesia      | 67 (51.9%)   | 6 (40.0%)        | 5 (33.3%)   | 21 (65.6%)  | 23 (54.8%)  | 12 (48.0%)  |
| Delayed 1st stage                | 28 (21.7%)   | 6 (40.0%)        | 4 (26.7%)   | 3 (9.38%)   | 10 (23.8%)  | 5 (20.0%)   |
| Meconium stained liquor          | 12 (9.30%)   | 1 (6.67%)        | 1 (6.67%)   | 3 (9.38%)   | 6 (14.3%)   | 1 (4.00%)   |
| Abnormal fetal heart rate        | 9 (6.98%)    | 0 (0.00%)        | 0 (0.00%)   | 3 (9.38%)   | 2 (4.76%)   | 4 (16.0%)   |
| Delayed 2nd stage                | 9 (6.98%)    | 1 (6.67%)        | 3 (20.0%)   | 1 (3.12%)   | 1 (2.38%)   | 3 (12.0%)   |
| Maternal complication            | 1 (0.78%)    | 0 (0.00%)        | 1 (6.67%)   | 0 (0.00%)   | 0 (0.00%)   | 0 (0.00%)   |
